# Supplementary material for: Induced acute hyperglycemia modifies the barrier function of the intestinal epithelium by tissue inflammation and tight junction disruption resulting in hydroelectrolytic secretion in an animal model
Source: PubMed Central journal article supplement (PMC11027184; doi:10.1590/1414-431x2024e13309), 2024-04-19

## Supplementary material

**Table S1.** Gene primers and annealing condition.

| Genes      | Sequence of primers                                                       | Temperature |
|------------|---------------------------------------------------------------------------|-------------|
| Occludin   | S – AAC AGC CCC CTA ATG TGG AAG<br>AS – GAG TAG GCC ATT GGA ACT GTCG      | 60°C        |
| ZO-1       | S – CTC GCA CGT ATC ACA AGC TGA<br>AS – CCT CAG GAT ATG GCT CCT TCC       | 60°C        |
| Claudin-2  | S – AGG ACT TCC TGC TGA CAT CCA<br>AS – TCC ACC CAC TAC AGC CAC TCT       | 60°C        |
| Claudin-15 | S – GAC CTC TCC AGA AAG GCC AAG<br>AS – AGA TAG CAA CCA ATG CCA CAGG      | 58°C        |
| NHE3       | S – CTC TGG GGC AGG AAT TGA TA<br>AS – AGA TAG CAA CCA TGC CAC AAG        | 58°C        |
| CFTR       | S – GCA ATG GGC TGT GAA CTC AA<br>AS – ACC TCC AGA GGG CCA GGT AT         | 60°C        |
| SGLT-1     | S – GCT GGA GTC TAC GTA ACA GCA CA<br>AS – GGG CTT CTG CAT CTA TTT CAA TG | 58°C        |
| PEPT-1     | S – AGC AGA GAT CGA GGC ACA GT<br>AS – TTC CCT ACG CCC TTT TTC TT         | 60°C        |
| GAPDH      | S – GTT ACC AGG GC TGCC TTC TCT<br>AS – AAC TTG CCG TGG GTA GAG TCA       | 60°C        |

S: sense primer (5'-3'); AS: antisense primer (3'-5'); reference gene: GAPDH.

**Figure S1.** Serum albumin levels and nitrogen balance in MetS-D. **A**, Serum albumin levels and nitrogen balance values in MetS-D and control animals (n= 6–10). **B**, Nitrogen balance values correspond to ingested nitrogen (g protein/6.25) subtracted from excreted nitrogen (24h urea g x 0.47). Data are reported as mean  $\pm$  SE. \*P<0.05; unpaired data, Student's *t*-test.

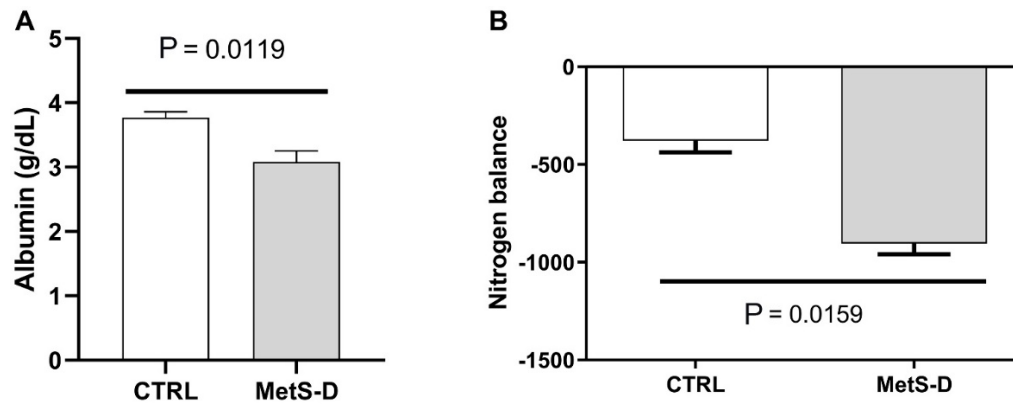

Supplement: 1414-431X-bjmbr-57-e13309-suppl.pdf [file 1414-431X-bjmbr-57-e13309-suppl.pdf]
